# Supplementary material for: Challenges assessing the effect of AMVs to improve the predictability of a medicane weather event using the EnKF. Storm-scale analysis and short-range forecast
Source: Copernicus journal article supplement (doi:10.5194/nhess-2022-58), 2022-03-09
Supplement: Supplementary file [file nhess-2022-58-AC2-supplement.pdf]

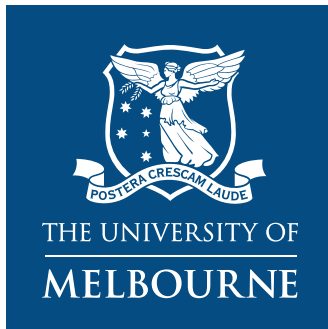

**The University of Melbourne**  
Diego Saúl Carrió Carrió  
School of Geography, Earth and Atmospheric Sciences and  
Centre of Excellence for Climate Extremes  
Parkville, 3010  
Victoria, AUSTRALIA  
[diego.carriocarrio@unimelb.edu.au](mailto:diego.carriocarrio@unimelb.edu.au)  
Melbourne, September 23, 2022

Dr. Joanna Staneva  
Editor– Natural Hazards and Earth System Sciences

Dear Joanna Staneva,

Please find attached the revised version of the manuscript **NHESS-2022-58** entitled ***“Challenges assessing the effect of AMVs to improve the predictability of a medicane weather event using the EnKF. Storm-scale analysis and short-range forecast”***.

I have carefully examined the constructive suggestions made by the reviewers and I have taken full account of their comments. Therefore, the main results of the work are now better described and emphasized. The following is a point-by-point response to the comments and inquiries made by the second reviewer. I thank the reviewer for their comments and believe the manuscript is now greatly improved both in terms of clarity and readability. I believe that the new version of the manuscript, which have been improved significantly, will help the reader to better understand the work presented here.

With best regards,

Diego Carrió Carrió

## **ANSWERS TO THE REVIEWER**

### **Reviewer #2:**

*The author describes and implements an assimilation system to improve the prediction of medicane Qendresa of 2014 using atmospheric motion vectors (AMVs) and other observations. The author presents the result of four ensemble simulations: one without data assimilation and 3 experiments with data assimilation (SYN, RSAMV, CNTR, section 3.4).*

### **Major comments:**

*Main remarks are as follow:*

- 1. The author mentions that not all assimilative ensemble members represent the medicane (roughly only the half of the ensemble includes the mediane; exact number of the experiments are on page 20). The manuscript did not mention how many of the ensemble members for the free ensemble model run includes the medicane but judging from figure 11, it seems more ensemble members of the free ensemble represent this medicane. Unfortunately, this is not addressed in the manuscript. It would seem to me a necessary first step, why apparently the assimilation inhibits the generation/developpement of the medicanes and to improve this aspect.*

I really appreciate the reviewer's comment about this point, and I agree that it requires a further explanation. In the case of the NODA experiment, the number of ensemble members that reproduce a cyclone is 29/36, which of course is a bigger number than the rest of data assimilation experiments. The following sentence have been added to the manuscript to provide information about the number of ensemble members of NODA producing the medicane:

*“It is important to note that although most of the ensemble members of NODA (29/36) simulate small vortex circulations, the associated trajectories (“inverted-U” shape) differ significantly from the observations (“U” shape), particularly during the mature stage of the medicane.”*

However, note that the tracks depicted by NODA are completely off in comparison with the observations, in particular during the mature stage of the medicane. In addition, they are not able to reproduce the observed trajectory loop in terms of location and time (see comparison in Fig. 12 using the best track selected subjectively). In other words, although NODA reproduces more cyclones, they are not correctly forecasted in terms of trajectory. On the other hand, when all the available observations in this study are assimilated (CNTRL run), the medicane tracks seem to behave more like the observed track, showing the “U” shape characteristic of the observed track. In terms of the error, Figure 13 shows how the track error in the CNTRL experiment is less than NODA during the mature phase, between 16 UTC and 23 UTC on 7 November.

Furthermore, it is also important to note that in this study, NODA is initialized with more recent initial and boundary conditions from the global model valid at 00 UTC 7 November (Fig. 6). However, the data assimilation experiments are initialized using initial and boundary conditions from 12 UTC 6 November, 12 hours before, when the cyclone was not formed. In this sense, one should avoid direct comparison between NODA and DA experiments and be careful with the conclusions that could obtain from this comparison. Here, we are comparing

our data assimilation experiments with NODA, which is initialized with more recent initial conditions from the global model. As it is explained in the manuscript, this comparison is made in this way because we were interested in a comparison from an operational point of view. For example, let's assume that today will take place a severe weather event affecting our local region. What approach should we use: (a) use the most recent initial conditions from global ECMWF (i.e., direct downscaling which does not account for convective-scale observations, such as radars) or (b) should we use the previous analysis from the ECMWF and then assimilate different observations at convective scales, such as reflectivity from radar with high spatial and temporal resolution? This is the motivation behind this comparison, and we have performed other past studies applying the same methodology (see Carrió et al., 2016 or Carrió et al., 2019). For this reason, I believe that we cannot conclude that the assimilation of observations are inhibiting the development of the medicane, because the data assimilation experiments are using different initial and boundary conditions from the global ECMWF, and it is not directly comparable with the NODA results. In fact, NODA initialized at 12 UTC 6 November (which is not shown in the manuscript), which would be a fairer comparison against the data assimilation experiments, shows 18 cyclones, a similar number of cyclones that the ones observed in the data assimilation experiments.

### References:

Carrió, D. S., Homar, V., & Wheatley, D. M. (2019). *Potential of an EnKF storm-scale data assimilation system over sparse observation regions with complex orography. Atmospheric Research, 216, 186-206.*

Carrió, D. S., & Homar, V. (2016). *Potential of sequential EnKF for the short-range prediction of a maritime severe weather event. Atmospheric Research, 178, 426-444.*

2. *The model validation statistics later are only based on the subset of model members representing the medicane which can result in a misleading interpretation. For the sake of argument, let's take an extreme case when only one ensemble member would represent the medicane track but with good accuracy. The average track would then be simply equal to this medicane track. In an ensemble would represent 11 members with an mediane, one with a good trak and one with a 10 a biased track, then the average will be worse than the first ensemble average track. In a forecasting scenario you are not sure whether actually a mediane will develop or not, the latter example (ensemble with 11 medicanes) seems to be more informative to me. However, by computing the average only over members including the medicanes favors in this case, the ensemble members with fewer medicanes. To make this more concrete, we can use Figure 15 where the atmospheric pressure at the Malta airport is shown. In a forecasting scenario, your best estimate of the atmospheric pressure would be the ensemble mean using all ensemble members (including those who do not include the medicane) as you do not know yet if the medicane will actually develop or dissipate early. From Figure 15, it even seems that all 36 ensemble members of the free ensemble simulation were used (even those with a very weak depression) which would bias the results even more towards the assimilation simulation where the ensemble members without medicane are excluded.*

I totally agree with the reviewer that only accounting for the ensemble members that reproduce the medicane would lead a misleading interpretation, **if and only if**, the information about the number of ensemble members that it is used to compute this average is not provided. Here, our intention is simply to quantify the error of the cyclone tracks obtained by the different

experiments in comparison with the observations. The problem is that every single experiment is forecasting different number of cyclones, so the comparison in terms of track error is not straightforward. That's why we just use the ensemble members that were forecasting a cyclonic circulation. In terms of the comparison between the data assimilation experiments (i.e., SYN, RSAMV, CNTRL), the number of ensemble members that depicts a cyclone is approximately the same, so comparing their performance is a good approximation. However, the number of ensemble members producing a cyclone in NODA is significantly different, and we should bear in mind this, as the reviewer suggests. For this reason, I have added a sentence in the manuscript to remind the reader that the comparison we are doing here is only fair/valid if we bear in mind all the aspects of the different experiments, such as the number of ensemble members that reproduce a cyclone:

*“To assess the error associated to the cyclone's trajectory, the distance between the ensemble mean center of the simulated cyclone and the observed one are computed for each time step (Fig. 13). Before the moment of maximum intensity (i.e., approximately at 18 UTC 7 November) NODA experiment depicts a mean track error lower than the data assimilation experiments. However, as we get closer to the maximum intensity of the cyclone, data assimilation experiments depict lower error values than NODA until 00 UTC 8 November. During this period, mean track error values from the data assimilation experiments become indistinguishable between them. After 00 UTC 8 November, the errors associated with the data assimilation experiments start to grow and the error associated with NODA start to decrease until the end of the simulation. Regarding the ensemble spread of each experiment (shaded areas in Fig. 13), it is showed that all data assimilation experiments have larger spread than the NODA. **Because the number of ensemble members between NODA and the DA experiments used to compute the track error differs significantly, special caution should be taken making conclusions comparing NODA and data assimilation results.**”*

Regarding the reviewer comment from Figure 15 we believe that maybe the idea behind how this figure was made is not clear enough and thus, further explanation must be provided to improve the understanding of such Figure. Here, we were interested in comparing the evolution of the pressure registered at the airport of Malta, where the medicane cross over it, with the *Eulerian* evolution of the pressure obtained at the center of the cyclone. Ideally, if the center of the simulated medicane hit Malta, one would take that point fixed in Malta and obtain all the pressure values during the same period of the observations, and then compare these values with the observations. However, in our simulations most of the cyclone tracks do not cross over Malta. In those cases, and as an approximation, we took the closest grid model point associated with the cyclone track to Malta. Then, we obtain all the pressure values of that point during the same time window of the observations. In this sense, we cannot include in Fig. 15 the ensemble members that do not reproduce the cyclone, because we need a cyclone track to reproduce Fig. 15. It would not have sense to create a similar Fig. 15 showing the MSLP evolution of each ensemble member at the closest grid point to Malta because that information would not be related with each individual medicane evolution. Nevertheless, we also agree with the reviewer that one should bear in mind that these figures do not account for the full ensemble and so, special caution should be taken looking at these results.

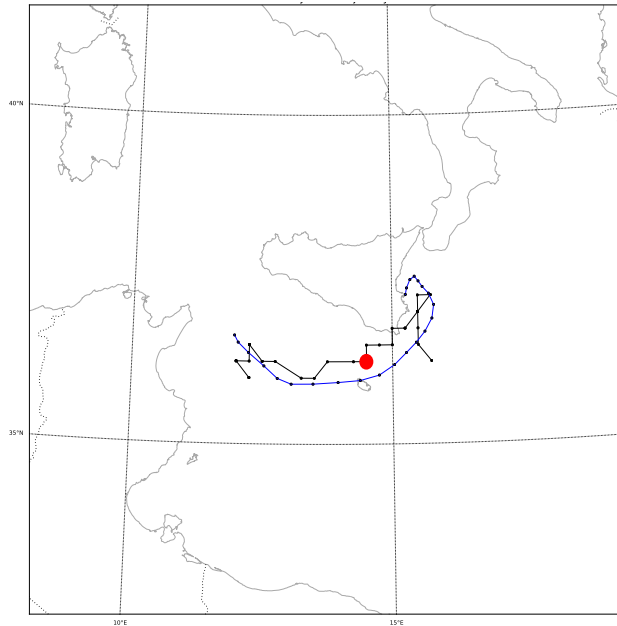

Figure 1. Example of the procedure followed to create Fig. 14. Black line corresponds to model trajectory and blue line corresponds to observed trajectory. The red point is the closest grid model point associated with the cyclone track of the model to Malta. Pressure values are obtained from this red point during the same time window of the observations.

Following the reviewer suggestion, we have added the following sentences to clarify these points:

*“Taking into account the inherent difficulty of the models in properly predicting the intensity of TCs, the effect of assimilating conventional and RSAMV observations is explored. In this case, the lack of in-situ observations over the region where Qendresa took place is the main challenge to properly verify the cyclone’s intensity forecasts in a Lagrangian sense (following the medicane evolution). Instead, we took advantage of the fact that the medicane crossed over Malta island, where METAR instruments registered a pressure drop greater than 20 hPa in 6h, reaching a minimum surface pressure value of 985 hPa. In this context, to assess the skill of the different numerical experiments, the METAR information from the Malta airport was used. Specifically, the surface pressure evolution measured by the METAR at Malta was compared against the obtained from the ensemble members simulating the medicane for each experiment. To achieve this comparison, for each ensemble member performing the medicane, we take the evolution of the surface pressure of the closest trajectory grid point to Malta airport and then compare it with the METAR observations.”*

3. *Even when using their selective validation approach, the improvements from the assimilation are not so clear. For instance on Figure 13, it is not so clear to me that overall the assimilation experiments (SYN, RSAMV, CNTR) are actually better than ensemble with data assimilation given the large bias at the end. Is it also surprising that the type of the observations assimilation (which are very diverse) do not seem to matter much.*

We understand the point of view of the reviewer, but it is important to bear in mind again the fundamental differences between NODA and the assimilation experiments (discussed in the previous point above). In addition, the large bias shown in Figure 13 at the end is likely related to the fact that in this case, after 23 hours of free simulation the impact of the observations

assimilated is reduced significantly. When assimilating observations such as reflectivity from radar, the effect last for just a couple of hours (i.e., 3-6 hours). For conventional observations such the ones assimilated in this study, the effect last longer. To clarify this point we have added the following sentence to the manuscript:

*“... After 00 UTC 8 November, the errors associated with the data assimilation experiments start to grow and the error associated with NODA start to decrease until the end of the simulation. Note that the large difference between NODA and the data assimilation experiments at the end of the simulation is associated with the fact that the impact of the initial conditions decreases significantly after 23-24 hours of free forecast. In other words, the model starts to “forget” the information introduced in the initial conditions from the different types of observations assimilated. Regarding the ensemble spread of each experiment (shaded areas in Fig. 13), it is showed that all data assimilation experiments have larger spread than the NODA. Because the number of ensemble members between NODA and the DA experiments used to compute the track error differs significantly, special caution should be taken making conclusions comparing NODA and data assimilation results.”*

Regarding the concerns from the reviewer about that the type of observations assimilated do not seem to matter much, we agree, at least for this case. However, it is not surprising for us. Remember that within the subset of *in-situ* conventional observations, we have wind direction and wind speed observations. On the other hand, the RSAMV observations are just that, wind direction and wind speed, but distributed in a more homogenously way in the horizontal and in the vertical. Thus, we are assimilating basically the same type of observations but with different distributions. In addition, it is important to bear in mind that this event was shown in previous studies to be sensitive to upper-level dynamics (i.e., PV structure). So assimilating observations related to the dynamics, such as wind, are the observations that are more relevant. That’s why the differences between SYN and RSAMVs are not so important, because they are assimilating basically the same wind information, but with different spatial distributions. Looking at Fig 12 and comparing SYN (Fig. 12b) with RSAMV (Fig. 12c), we can observe a significant different in the track, being RSAMVs the experiment that shows a track closer to Malta, where the cyclone crossed over.

4. *Another problem is that the manuscript does not show clearly which comparisons are against independent data and which are against assimilated data. In Figure 9, a correlation coefficient between model and maritime buoys of 0.996 is presented. If this is assimilated data, then you could easily have an correlation coefficient almost equal to 1, if you let the error variance of these observations tend to zero. But clearly, this would lead to a highly degraded forecast.*

We thank to the reviewer for pointing out this and we totally agree that we need to provide such information. The only section where we use data assimilated was to perform the different observation space diagnostics in Section 4.1 (i.e., Figs. 7-10) to check that the system was working as expected. These types of diagnostics are typically used in DA papers (e.g., Yussouf et al., 2013; Wheatley et al., 2015; Carrió et al., 2019). We have added the following sentence at the beginning of Section 4.1 to clarify this:

*“... These diagnostics and the rest of diagnosis computed in this subsection are computed using the entire set of assimilated type of observations (i.e., METARs, buoys, rawinsondes and RSAMVs).”*

Verification of the track and intensity of the medicane (Section 4.2) are performed using independent observations (i.e., observations not assimilated). To better clarify this point in the manuscript, the following sentence has been added at the beginning of Section 4.2:

*“... the potential impact of assimilating the above-mentioned observations to simulate the observed trajectory of the medicane and its intensification is investigated. Model output verification scores shown in this section will be computed using an independent set of different observations not assimilated previously, which will be (a) the surface pressure registered at the METAR located in the airport of Malta, where the cyclone crossed over it, and (b) the approximated medicane track obtained by visual inspection of infrared satellite imagery.”*

### **Specific comments:**

- *Line 55: “Although both methods are slightly different and contain different types of errors associated, the overall information drawn from them has been found to be equivalent (Migliorini, 2012). From these reasons, in this study only satellite-derived products will be considered.” The cited study Migliorini (2012) does not show that the assimilation for both methods is an all cases equivalent. It rather defines two testable conditions, under which both approaches lead to equivalent results: “(i) the radiance observation operator needs to be approximately linear in a region of the state space centered at the retrieval and with a radius of the order of the retrieval error; and (ii) any prior information used to constrain the retrieval should not underrepresent the variability of the state, so as to retain the information content of the measurements.” The author should check that two conditions deduced by Migliorini (2012) are verified before stating that both methods are equivalent.*

This sentence has been modified to the following:

~~*“Although both methods are slightly different and contain different types of errors associated, the overall information drawn from them has been found to be equivalent (Migliorini, 2012). From these reasons, in this study only satellite-derived products will be considered.”*~~ → *“To avoid dealing with nonlinearities associated with the assimilation of radiance observations using RTM, only satellite-derived products will be considered in this study.”*

- *Line 92: “Among the different available medicanes, the so called Qendresa, which took place southern Sicily between 7-8 November 2014 (Carrió et al., 2017) and was poorly forecasted, was selected to perform this study. More precisely, the correct prediction of both the northward loop trajectory followed by Qendresa and its intensification still remain a major challenge for most current numerical weather models.” Can you be more specific which models did a poor forecast and show a figure of the forecast and actual and predicted path (and intensity)?*

Qendresa is a well-know medicane in the weather forecast community in the Mediterranean that has been characterized to be very difficult to predict in terms of intensity and trajectory. As the present study is a continuation of our last study on this medicane (Carrió et al., 2017), we strongly believe that adding a new figure and more details about the models used in previous studies in the present manuscript could distract the reader attention of the main line of this study and will not provide useful information. In addition, it is not desirable to add more figures in this manuscript because the large number of them in the present version. However, we agree with the reviewer that we need to add more information about this and

adding references could be the best way of providing such information. We have modified the original sentence as follows:

~~“Among the different available medicanes, the so-called Qendresa, which took place southern Sicily between 7-8 November 2014 (Carrió et al., 2017) and was poorly forecasted, was selected to perform this study. More precisely, the correct prediction of both the northward loop trajectory followed by Qendresa and its intensification still remain a major challenge for most current numerical weather models.”~~ → “Among the different available medicanes, the so-called Qendresa, which took place southern Sicily between 7-8 November 2014 and was poorly forecasted, was selected to perform this study. More precisely, the correct prediction of both the northward loop trajectory followed by Qendresa and its intensification remain a major challenge for most current numerical weather models (e.g., Carrió et al., 2017; Cioni et al., 2018; Pytharoulis, 2018; Noyelle et al., 2019; Bouin et al., 2020).”

### References:

Carrió, D. S., Homar, V., Jansa, A., Romero, R., & Picornell, M. A. (2017). Tropicalization process of the 7 November 2014 Mediterranean cyclone: Numerical sensitivity study. *Atmospheric Research*, 197, 300-312.

Pytharoulis, I. (2018). Analysis of a Mediterranean tropical-like cyclone and its sensitivity to the sea surface temperatures. *Atmospheric Research*, 208, 167-179.

Cioni, G., Cerrai, D., & Klocke, D. (2018). Investigating the predictability of a Mediterranean tropical-like cyclone using a storm-resolving model. *Quarterly Journal of the Royal Meteorological Society*, 144(714), 1598-1610.

Noyelle, R., Ulbrich, U., Becker, N., & Meredith, E. P. (2019). Assessing the impact of sea surface temperatures on a simulated medicane using ensemble simulations. *Natural Hazards and Earth System Sciences*, 19(4), 941-955.

Bouin, M. N., & Lebeaupin Brossier, C. (2020). Impact of a medicane on the oceanic surface layer from a coupled, kilometre-scale simulation. *Ocean Science*, 16(5), 1125-1142.

- Line 157: “These simulations used a multi-scale ensemble system based on two one-way nested domains to better account for meso- and storm-scale processes involved in the genesis and evolution of Qendresa (Fig. 2).” Why only one-way nesting is used here (WRF supports two-way nesting if I am not mistaken)?

The reviewer is right, the WRF support two-way nesting. However, from the wide experience of my former research Group, we noticed that for this kind of configuration where the inner domain is centered over a quite large parent domain, such the one used in this study, no differences are appreciated apart from the fact that the two-way nesting takes more time to run the simulations. In cases where the boundary conditions are close to the inner domain could be more beneficial to use the two-way nesting.



- *Line 230: “Following similar studies (e.g., Romine et al. (2013); Yussouf et al. (2015); Carrió and Homar (2016)), the observational error values used here for the conventional observations are: 0.75 K for the temperature, 0.75 K for the dew point temperature, 0.75 m s<sup>-1</sup> for the wind speed and 0.75 hPa for the pressure.” In Romine et al. (2013), they use “NCEP statistics” for temperature, Lin and Hubbard (2004) for the dew point temperature, 1.75 m/s for E–W, N–S winds (Buoy and ship reports) and 1 hPa for altimeter (also Buoy and ship reports). Also AMV errors are 50% NCEP statistics in Romine et al. (2013). This seems to me (not a meteorology expert) quite different from the fixed value approach here. In Yussouf et al. (2015), the used observation errors are described as: The assumed observation errors are the same as in Table 3 of Romine et al. (2013) except for METAR and marine temperature (1.75 K), METAR altimeter (0.75 hPa), and marine altimeter (1.20 hPa). I don't understand how the citations are used to support the choice of these parameter values (except for the METAR altimeter) which are crucial for data assimilation (as also noted by the author).*

We thank the reviewer for pointing out this misunderstanding. We initially based our choices to studies dealing with similar problems, such as Romine et al. (2013) and Yussouf et al. (2015). However, we end using the same values used in Carrió et al. (2018), where observational error used were analogous to Table 3 in Romine et al. (2013) with minor exceptions: METAR altimeter (1.5 hPa), marine altimeter (1.20 hPa) and METAR and marine temperature (1.75 K).

Following the reviewer comment, we have modified the original sentence as follows:

*“~~Following similar studies (e.g., Romine et al. (2013); Yussouf et al. (2015); Carrió and Homar (2016)), the observational error values used here for the conventional observations are: 0.75 K for the temperature, 0.75 K for the dew point temperature, 0.75 m s<sup>-1</sup> for the wind speed and 0.75 hPa for the pressure.~~”* → *“The observational error values used in this study for the conventional observations are analogous to Table 3 in Romine et al., (2013) with minor exceptions: METAR altimeter (1.5 hPa), marine altimeter (1.20 hPa) and METAR and marine temperature (1.75 K).”*

- *Figure 7 and 9: there are several assimilation runs introduced in the previous section. It is not clear to me which assimilation experiment is presented in Figure 7. Also, I think the author should take more clearly which comparisons are performed against independent data and which use dependent data (used in the analysis). Since for figure 9, a correlation coefficient of 0.996 is achieved for the posterior estimate, I suspect that this is comparison with dependent observation. Much more interesting would be validation with independent data: for example if you assimilated only RSAMV data, do you also improve compared to METARs, rawinsondes and buoys?*

We thank the reviewer for this comment, and we agree that no information about which experiment comes from these results is present. Fig's 7-10 are obtained from the CNTRL experiment. As we stated previously, such figures were performed using dependent observations, which is the usual way of verifying that the DA system is working as we expect. Then, to verify the forecasts results, we use independent observations. This methodology is very common in DA studies (see for example Romine et al. 2013; Wheatley et al, 2015; Jones et al, 2016; Yussouf et al., 2015).

In order to provide this information to the reader we have added the following sentence at the beginning of the Section 4.1:

*“To quantitatively assess the data assimilation performance during the 12-h data assimilation window, the following widely-used observation-space diagnostics (Yussouf et al., 2013; Wheatley et al., 2015; Carrió et al., 2019) are computed before and after each hourly data assimilation cycle using the background and EnKF analysis model states, from the CNTRL experiment, mapped to the observation locations”*

## **References:**

*Wheatley, D. M., K. H. Knopfmeier, T. A. Jones, G. J. Creager, 2015: Storm-Scale Data Assimilation and Ensemble Forecasting with the NSSL Experimental Warn-on-Forecast System. Part I: Radar Data Experiments. Weather and Forecasting, 30, 1795–1817, doi:10.1175/WAF-D-15-0043.1*

*Jones, T. A., K. Knopfmeier, D. Wheatley, G. Creager, P. Minnis, R. Palikonda, 2016: Storm-Scale Data Assimilation and Ensemble Forecasting with the NSSL Experimental Warn-on-Forecast System. Part II: Combined Radar and Satellite Data Experiments. Weather and Forecasting, 31, 297–327, doi:10.1175/WAF-D-15-0107.1*

*Yussouf, N., D. C. Dowell, L. J. Wicker, K. H. Knopfmeier, D. M. Wheatley, 2015: Storm-scale Data Assimilation and Ensemble Forecasts for the 27 April 2011 Severe Weather Outbreak in Alabama. Monthly Weather Review, 143, 3044–3066.*

- *Figures: text on Figure 7 and 8 is too small .*

The figures and labels have been enlarged.

- *Line 370: “In fact, for the SYN experiment only 17/36 ensemble members generate a small-scale isolated cyclone, while in the RSAMV, a reduced number of members simulate cyclones (16/36), and finally in the CNTRL experiment, this number is increased to 21/36.” How many ensemble members generate a cyclone for the simulation NODA and how many ensemble members in NODA are used for validation later on?*

As we stated on the first point of the reviewer above, 29/36 ensemble members generate a cyclone for NODA. For the same reasons I explained above, 29 members were used in the verification later. This information is now present in the last version of the manuscript.

- *Line 375: “Taking into account this, we have also represented the best track simulated by the different experiments in comparison with the trajectory observed by satellite imagery.” How do you define “best” here?*

We appreciate the referee comment about this point. Here, to simplify the problem, we have defined “best” in a subjective way, just comparing visually the different tracks for each ensemble member with the observed track. We were interested to obtain tracks with two main properties: (a) tracks that crossed over Malta and (b) tracks that show the loop-pattern at the end of the simulation. In order to avoid misunderstanding, we have rephrased the sentence in the following way:

*“Taking into account this, we have also represented, for each experiment, the track from the ensemble member that subjectively resembles the most the medicane trajectory observed by satellite imagery. For this purpose, we seek for two main features: (a) the medicane center should cross as close as possible to Malta island and ideally (b) the track of the medicane should show signals of a loop-ending on the eastern coast of Sicily.”*

- *Line 386: “and the error associated with NODA start to decrease until the end of the simulation.” and Figure 13: Overall the assimilation did not improve a lot compared to the simulation without data assimilation. During 17:00 - 23:00 November 7, the assimilation run has an error which is about 50 km lower, however during the end the error is about 50-100 km larger.*

The fact that the error of the assimilation experiments is bigger than NODA has already been explained above and it was related to the fact that after 23 hours of free model run, the information introduced to the estimate of the initial conditions through the assimilation is not affecting the forecast anymore. The time window in which the assimilation has effects on the forecasts depend on the type of observations. For instance, the impact of assimilating, reflectivity observations, lasts between 3-6 hours. Beyond that time, the forecast “forgets” about the data that was assimilated.

- *Figure 13: “ensemble spread (shaded areas) of track error (km)”: not all ensemble members present a cyclone. How is this taken into account? If in an ensemble, only one member would have represented a cyclone, would this correspond to a spread of 0 ?*

The members that do not present a cyclone are not considered. In the case of having just one member representing a cyclone, Fig. 13 would show a single line. However, we totally agree that Fig. 13 alone could be misinterpreted. For this reason, we have added a line in the manuscript that reminds the reader that those results are obtained considering different number of ensemble members. This point has already been solved previously.

*Figure 14: this analysis considers only the center of the medicane; if an ensemble would have a small but consistent bias the medicine track, it would result in a very low score when computing the PCC. It would be more useful to compute a probability map for the wind exceeding a given threshold.*

This figure was deleted after revision of reviewer #1.

- *Intensity (Figure 15): all experiments underestimate the intensity (indicated by the minimum pressure). But the NODA experiment most realistic mean (in terms of minimum pressure) and a significant fraction of the ensemble members for NODA show the right intensity (but with a time shift) while only few ensemble members with data assimilation for the have the correct intensity (but with a better timing). Timing better and better minimum pressure?*

Although NODA seems to have more ensemble members showing the right intensification (with a time shift) it also shows that a lot of ensemble members depicts shallow cyclones that are totally misplaced from the observed maximum of intensification. For instance, Fig. 15a shows that after 8 November 00 UTC a significant number of ensemble members depicts shallow cyclones. This is totally wrong. However, when we assimilate the different observations, we avoid such spurious cyclones. Again, is difficult to account for all ensemble

members, including the ones not showing a cyclone because the verification scores we are using requires having a cyclone. This points has already been solved in some of the above comments. To account for this problem, we have added a sentence in the manuscript that reminds the reader that the number of ensemble members used for each experiment is different, and so, general conclusions cannot be obtained.

**Minor issues:**

*Line 55: "From these reasons" -> "For these reasons"*

Done

*Line 104: Add citation for EnKF when mentioning it the first time (after the abstract). There are many variants of the EnKF. The reference is only included in section 3.3.*

Done

*Line 205: "In other words, one spectral channel can identify the same wind observation that another channel can identify. However, is not common that both different channels provides precisely the same value of such observation." The formulation is a bit awkward (besides the spelling issues "However, is" -> "However, it is", "provides" -> "provide"). Please rephrase.*

Done. "For instance, spectral channel number 1 could identify the same wind observation that channel number 4 could identify. However, it is not common that both channels provide precisely the same value of such observation, they are slightly different."

*Line 317: rmsi (and legend of plot 7) -> RMSE*

Done
